# Supplementary material for: Actinide-doped boron clusters: from borophenes to borospherenes
Source: Royal Society of Chemistry journal article supplement (doi:10.1039/d2cp04414e), 2022-01-01
Supplement: d2cp04414e1.pdf [file d2cp04414e1.pdf]

## **Electronic Supplementary Material (ESI)**

### **Actinide-doped boron clusters: from borophenes to borospherenes**

*Nai-Xin Zhang, Cong-Zhi Wang,\* Jian-Hui Lan, Qun-Yan Wu, Zhi-Fang Chai, and Wei-Qun Shi\**

Laboratory of Nuclear Energy Chemistry, Institute of High Energy Physics, Chinese  
Academy of Sciences, Beijing 100049, China

\*E-mail: shiwq@ihep.ac.cn; wangcongzhi@ihep.ac.cn

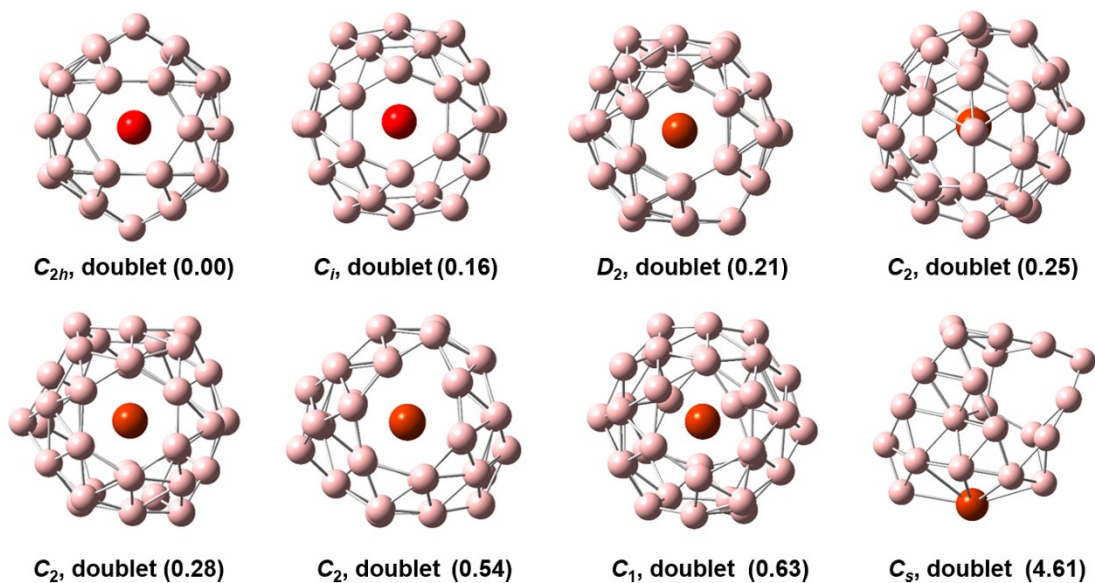

**Figure S1.** Low-lying isomers of Pa@B<sub>36</sub> with the relative energies (eV) at the PBE0/RECP/6-311+G\* level of theory. Light pink and red spheres represent B and Pa, respectively. All the energies have been corrected for zero-point energies.

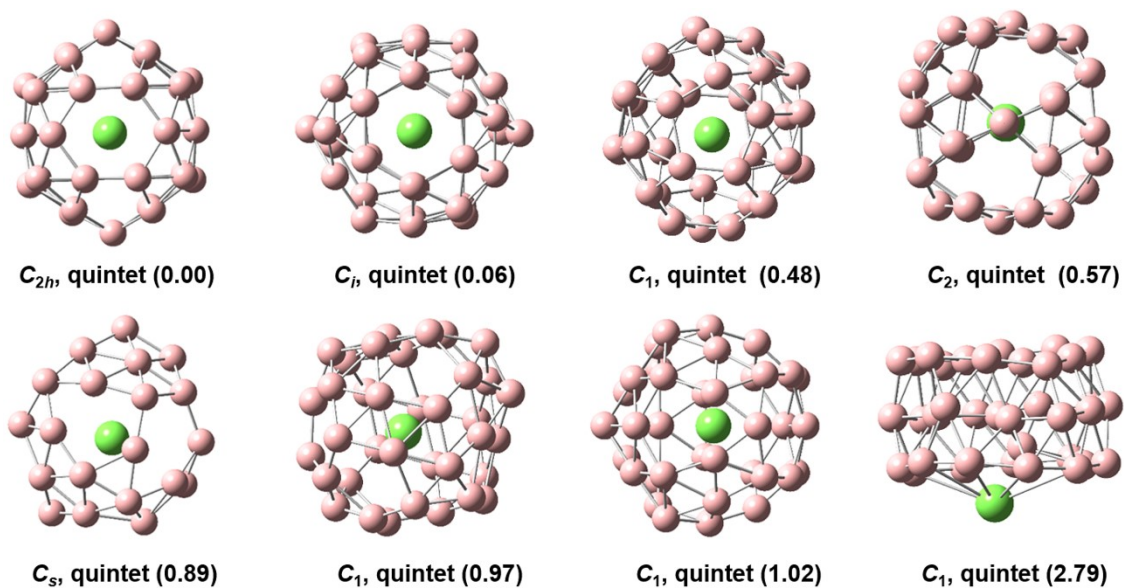

**Figure S2.** Low-lying isomers of Pu@B<sub>36</sub> with the relative energies (eV) at the PBE0/RECP/6-311+G\* level of theory. Light pink and green spheres represent B and Pu, respectively. All the energies have been corrected for zero-point energies.

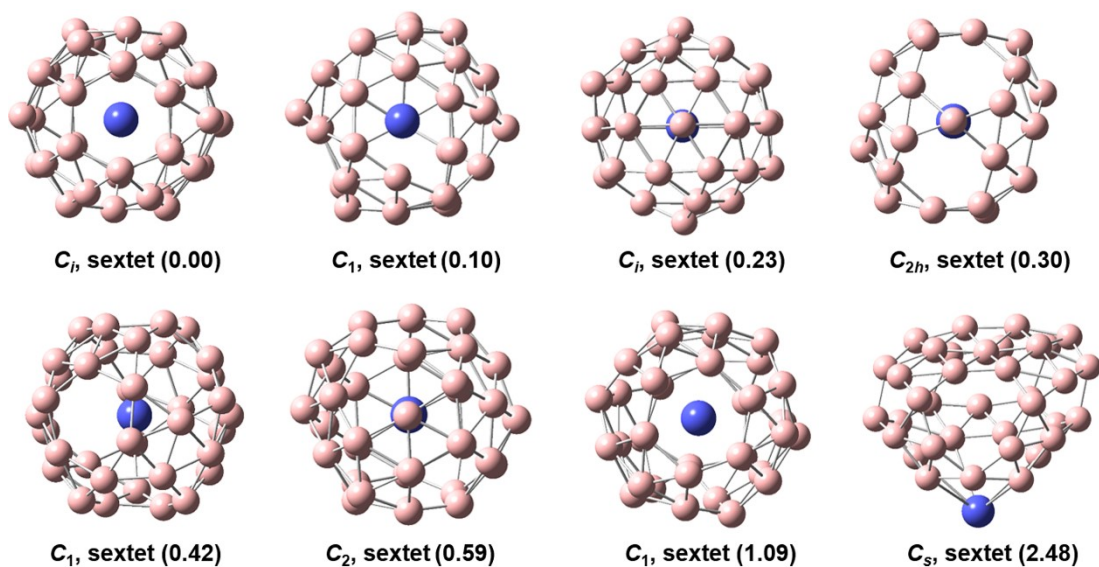

**Figure S3.** Low-lying isomers of  $\text{Am}@B_{36}$  with the relative energies (eV) at the PBE0/RECP/6-311+G\* level of theory. Light pink and blue spheres represent B and Am, respectively. All the energies have been corrected for zero-point energies.

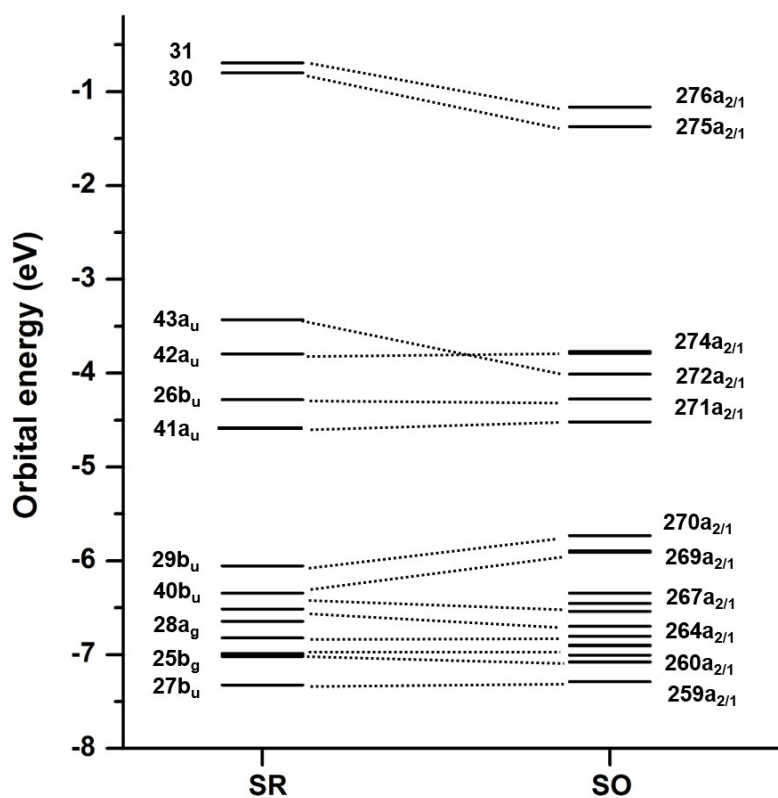

**Figure S4.** MO energy levels for  $C_{2h}$   $\text{Pu}@B_{36}$  with scalar relativistic (SR) and spin-orbit (SO) coupling.

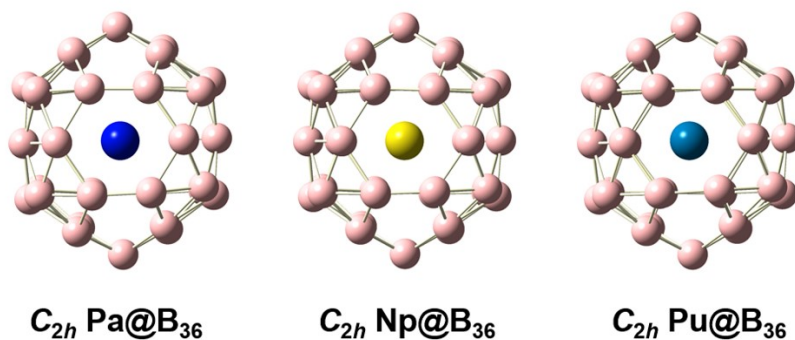

**Figure S5.** Optimized structures of An@B<sub>36</sub> (An= Pa, Np and Pu) at the PBE0-D3/RECP/6-311+G\* level of theory. Pink, dark blue, yellow, and blue spheres represent B, Pa, Np, and Pu, respectively.

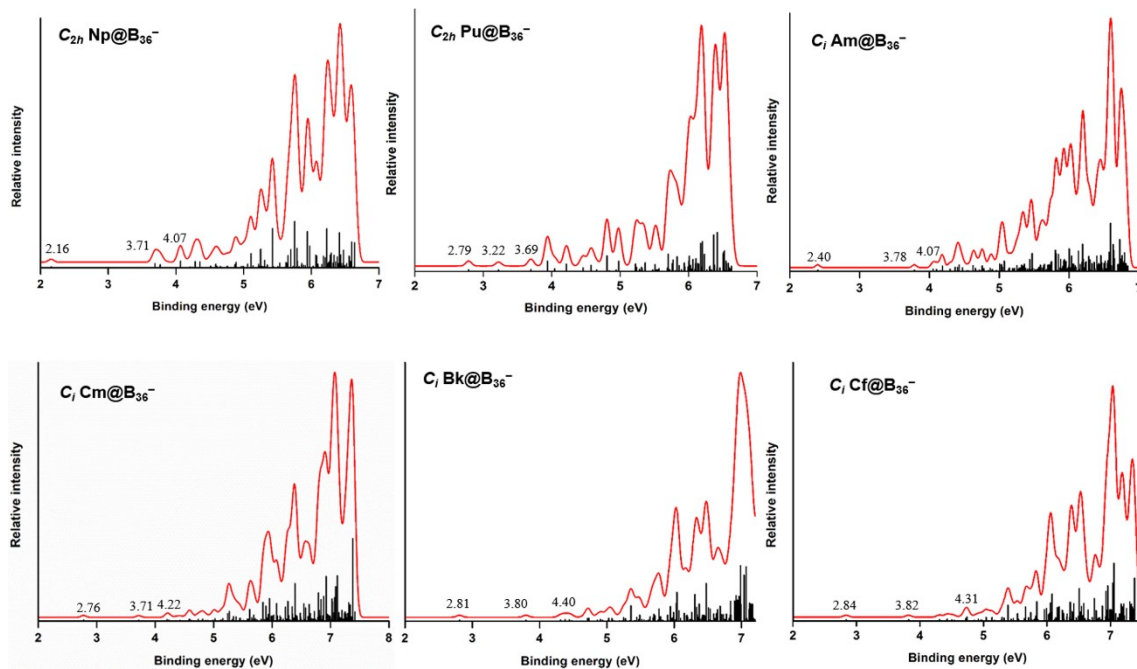

**Figure S6.** Simulated photoelectron spectrum of An@B<sub>36</sub><sup>-</sup> (An = Np, Pu, Am, Cm, Bk and Cf) at the PBE0/RECP/6-311+G\* level of theory.

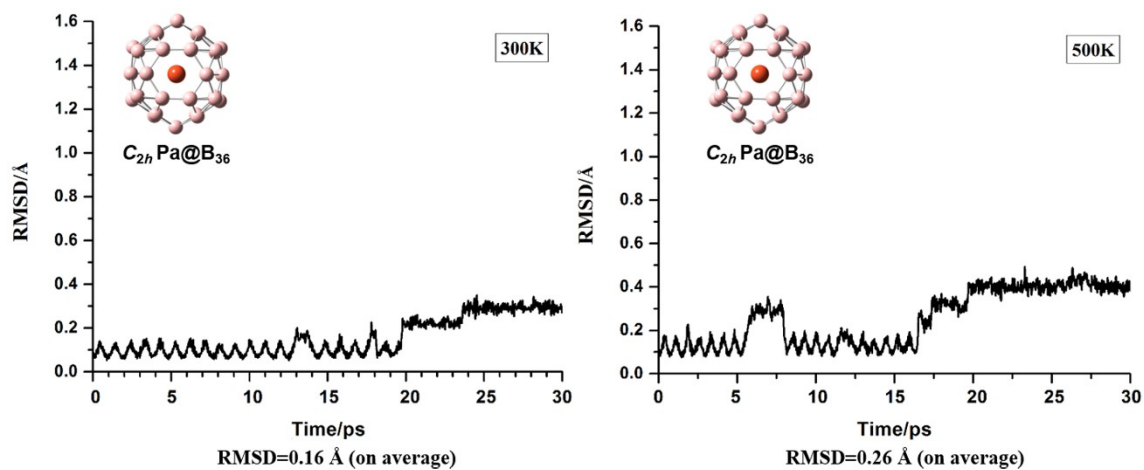

**Figure S7.** Molecular dynamics simulations of  $C_{2h}$  Pa@B<sub>36</sub> at 300K and 500K for 30 ps.

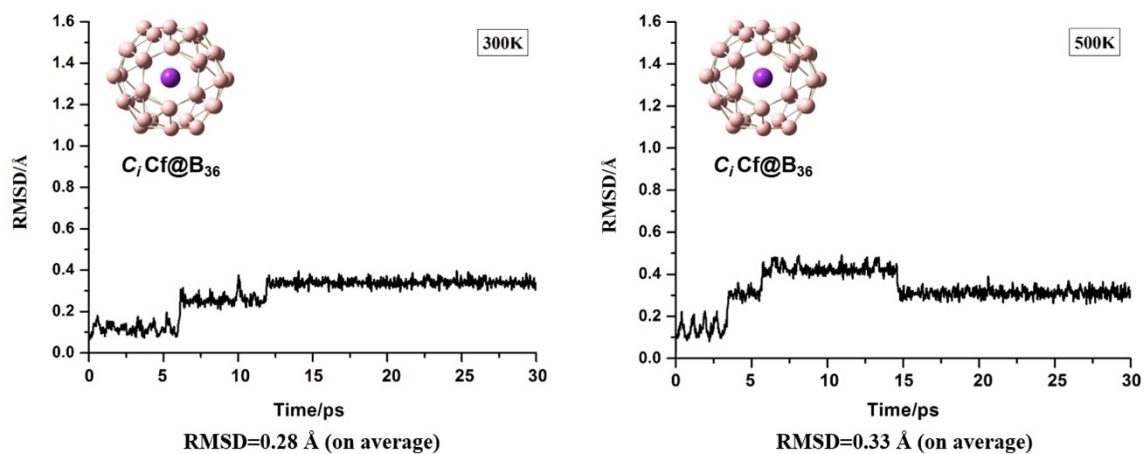

**Figure S8.** Molecular dynamics simulations of  $C_i$  Cf@B<sub>36</sub> at 300K and 500K for 30 ps.

**Table S1.** Spin states, spin contamination  $\langle S^2 \rangle$ , An-B bond distances ( $\text{\AA}$ ), and WBIs of the An-B bonds for the  $\text{An}@B_{36}$  (An= Pa, Np, Pu) complexes at the PBE0-D3/6-311+G\*/RECP level of theory.

| Species                  | Spin states | $\langle S^2 \rangle$ | An-B Bond Distances | An-B Bond WBIs     |
|--------------------------|-------------|-----------------------|---------------------|--------------------|
| $C_{2h}\text{Pa}@B_{36}$ | doublet     | 0.76                  | 2.707 - 3.067       | 0.253-0.435(0.316) |
| $C_{2h}\text{Np}@B_{36}$ | quartet     | 3.87                  | 2.716 - 3.090       | 0.208-0.382(0.272) |
| $C_{2h}\text{Pu}@B_{36}$ | quintet     | 6.44                  | 2.716 - 3.084       | 0.186-0.361(0.249) |

**Table S2.** The molecular orbital composition analysis of Pa (%) for  $\text{Pa}@B_{36}$  at the theoretical level of PBE0/6-311+G\*/RECP.

| Species            | Orbitals | 5f    | 6d    |
|--------------------|----------|-------|-------|
| $\text{Pa}@B_{36}$ | SOMO     | 50.16 |       |
|                    | HOMO     | 23.66 |       |
|                    | HOMO-1   | 28.54 |       |
|                    | HOMO-2   | 23.38 |       |
|                    | HOMO-3   | 14.92 |       |
|                    | HOMO-4   | 14.79 |       |
|                    | HOMO-5   |       | 2.11  |
|                    | HOMO-6   |       |       |
|                    | HOMO-7   | 1.15  |       |
|                    | HOMO-8   |       | 2.28  |
|                    | HOMO-9   |       | 16.64 |

**Table S3.** QAIM analysis of An@B<sub>36</sub> (An= Pa, Np, Pu) at the PBE0-D3/6-311+G\*/RECP theoretical level.

| Species                                   | $\rho$  | H        | $\nabla^2\rho$ | DI <sub>total</sub> |
|-------------------------------------------|---------|----------|----------------|---------------------|
| <i>C</i> <sub>2h</sub> Pa@B <sub>36</sub> | 0.04170 | -0.00765 | 0.07041        | 6.098               |
| <i>C</i> <sub>2h</sub> Np@B <sub>36</sub> | 0.03852 | -0.00648 | 0.07299        | 5.771               |
| <i>C</i> <sub>2h</sub> Pu@B <sub>36</sub> | 0.03734 | -0.00598 | 0.07321        | 5.443               |

**Table S4.** The first vertical detachment energies (VDE, eV) and adiabatic detachment energies (ADE, eV) of An@B<sub>36</sub> at the PBE0/6-311+G\*/RECP level of theory.

| Species                                   | VDE  | ADE  |
|-------------------------------------------|------|------|
| <i>C</i> <sub>2h</sub> Pa@B <sub>36</sub> | 2.42 | 2.30 |
| <i>C</i> <sub>2h</sub> Np@B <sub>36</sub> | 2.16 | 2.07 |
| <i>C</i> <sub>2h</sub> Pu@B <sub>36</sub> | 2.79 | 1.96 |
| <i>C</i> <sub>i</sub> Am@B <sub>36</sub>  | 2.40 | 2.30 |
| <i>C</i> <sub>i</sub> Cm@B <sub>36</sub>  | 2.77 | 2.65 |
| <i>C</i> <sub>i</sub> Bk@B <sub>36</sub>  | 2.81 | 2.69 |
| <i>C</i> <sub>i</sub> Cf@B <sub>36</sub>  | 2.84 | 2.71 |

**Table S5.** Formation energy ( $\Delta E$ , kcal/mol) of  $An@B_{36}$  ( $An = Pa, Np, Pu, Am, Cm, Bk, Cf$ ) at the PBE0/6-311+G\*/RECP level of theory.

| Reactions                           | $\Delta E$ |
|-------------------------------------|------------|
| $Pa + B_{36} \rightarrow Pa@B_{36}$ | -225.1     |
| $Np + B_{36} \rightarrow Np@B_{36}$ | -157.6     |
| $Pu + B_{36} \rightarrow Pu@B_{36}$ | -112.9     |
| $Am + B_{36} \rightarrow Am@B_{36}$ | -75.8      |
| $Cm + B_{36} \rightarrow Cm@B_{36}$ | -88.2      |
| $Bk + B_{36} \rightarrow Bk@B_{36}$ | -80.0      |
| $Cf + B_{36} \rightarrow Cf@B_{36}$ | -67.3      |

**Table S6.** The formation energy ( $\Delta E$ , kcal/mol) of  $An@B_{36}$  ( $An = Pa, Np, Pu$ ) at the PBE0-D3/6-311+G\*/RECP level of theory.

| Reactions                 | $\Delta E$ |
|---------------------------|------------|
| $Pa + B_{36} = Pa@B_{36}$ | -292.1     |
| $Np + B_{36} = Np@B_{36}$ | -245.5     |
| $Pu + B_{36} = Pu@B_{36}$ | -211.9     |
